# Supplementary material
Source: Springer Nature journal article supplement (https://www.springermedizin.de/resource/supplementary/13002_2013_341_MOESM3_ESM.pdf/9627660)
Supplement: MOESM3 [file 9627660]

**a)** Ecological variance, explained by Matrix **X**  
 $a = (a+b+c) - (b+c)$

**c)** Socio-economic variance, explained by Matrix **W**  
 $c = (a+b+c) - (a+b)$

**d)** Unexplained variance  
 $d = 1 - (a+b+c)$

Management of edible species plant interchanged at traditional markets of Tehuacan Cuicatlan Valley (Matrix **Y**)

**b)** Intersection of the ecological and socio-economical component  
 $b = (a+b) - a$
